# Supplementary material for: IRE1α-XBP1 is a novel branch in the transcriptional regulation of Ucp1 in brown adipocytes
Source: PubMed Central journal article supplement (PMC4644985; doi:10.1038/srep16580), 2015-11-16
Supplement: srep16580-s1.pdf [file srep16580-s1.pdf]

# **IRE1 $\alpha$ -XBP1 is a novel branch in the transcriptional regulation of *Ucp1* in brown adipocytes.**

## **Supplementary Information**

**Rie Asada, Soshi Kanemoto, Koji Matsuhisa, Kenta Hino, Min Cui, Xiang Cui, Masayuki Kaneko, and Kazunori Imaizumi.**

# Supplementary Figure 1.

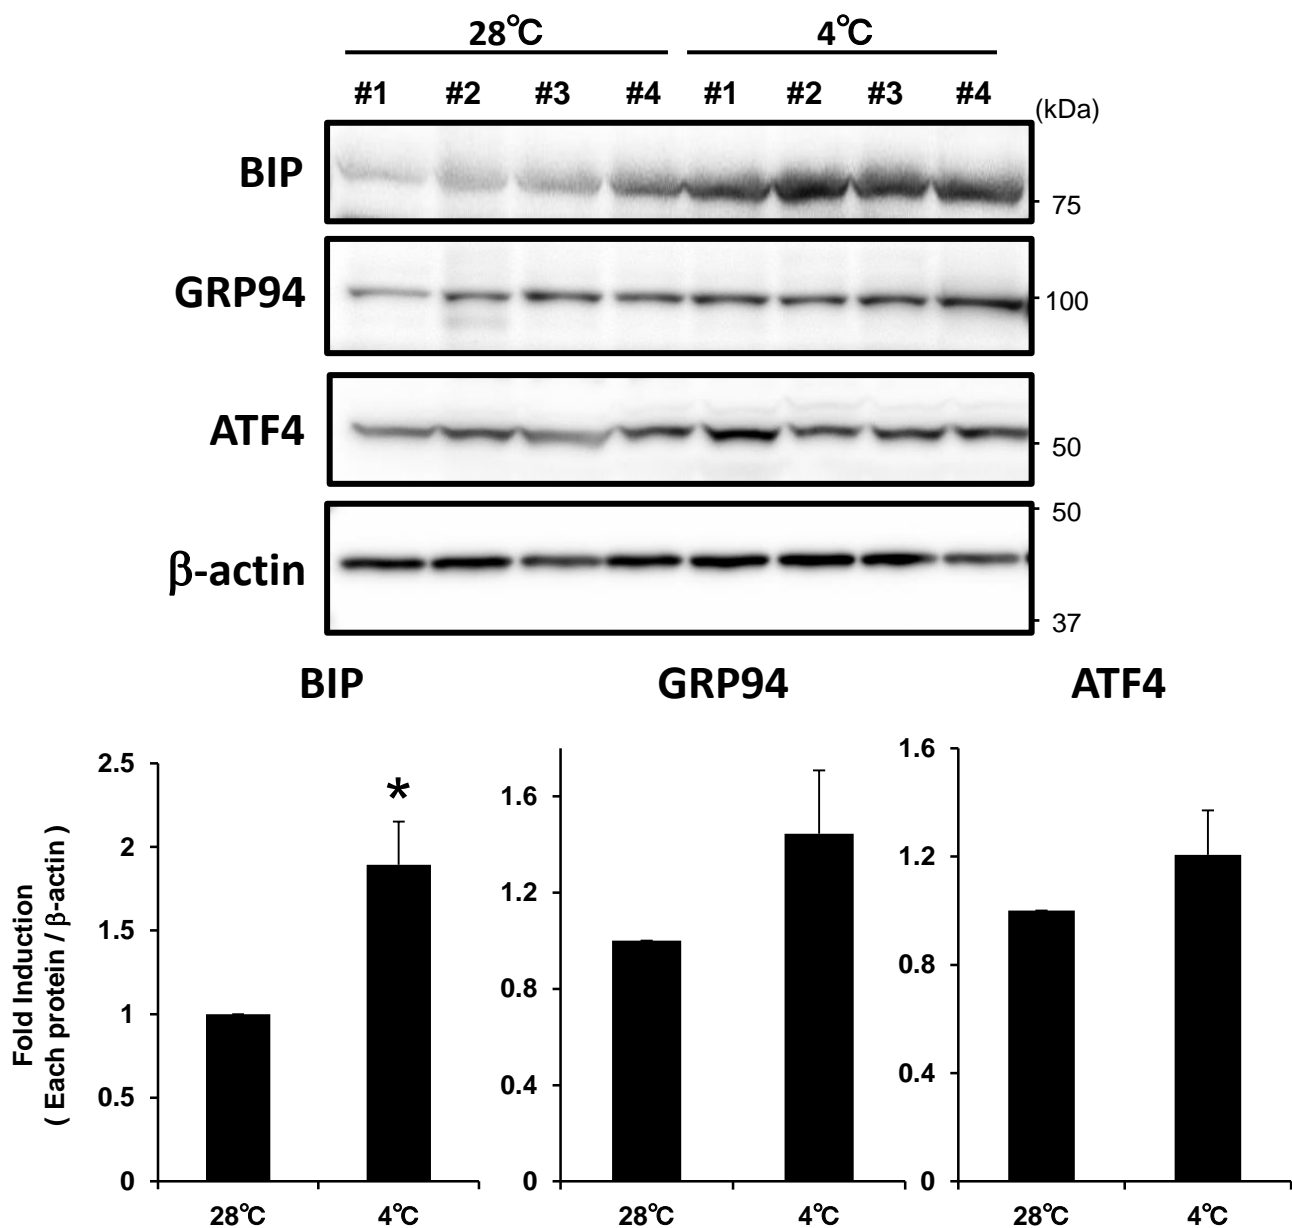

## Supplementary Figure 1. Cold exposure increased UPR-related proteins in BAT.

Western blotting (WB) analysis of Bip, GRP94, and ATF4 in BAT exposed to cold (4 ° C) for 24 h, or in control (28 ° C) BAT.  $\beta$ -actin was used as a loading control. Note that the significant increase in Bip protein was induced by cold exposure. Differences between control and cold exposure were analyzed by Student's t-test. Data are mean  $\pm$  S.D. (control: n = 4, cold: n = 4) \*P < 0.05.

## Supplementary Figure 2.

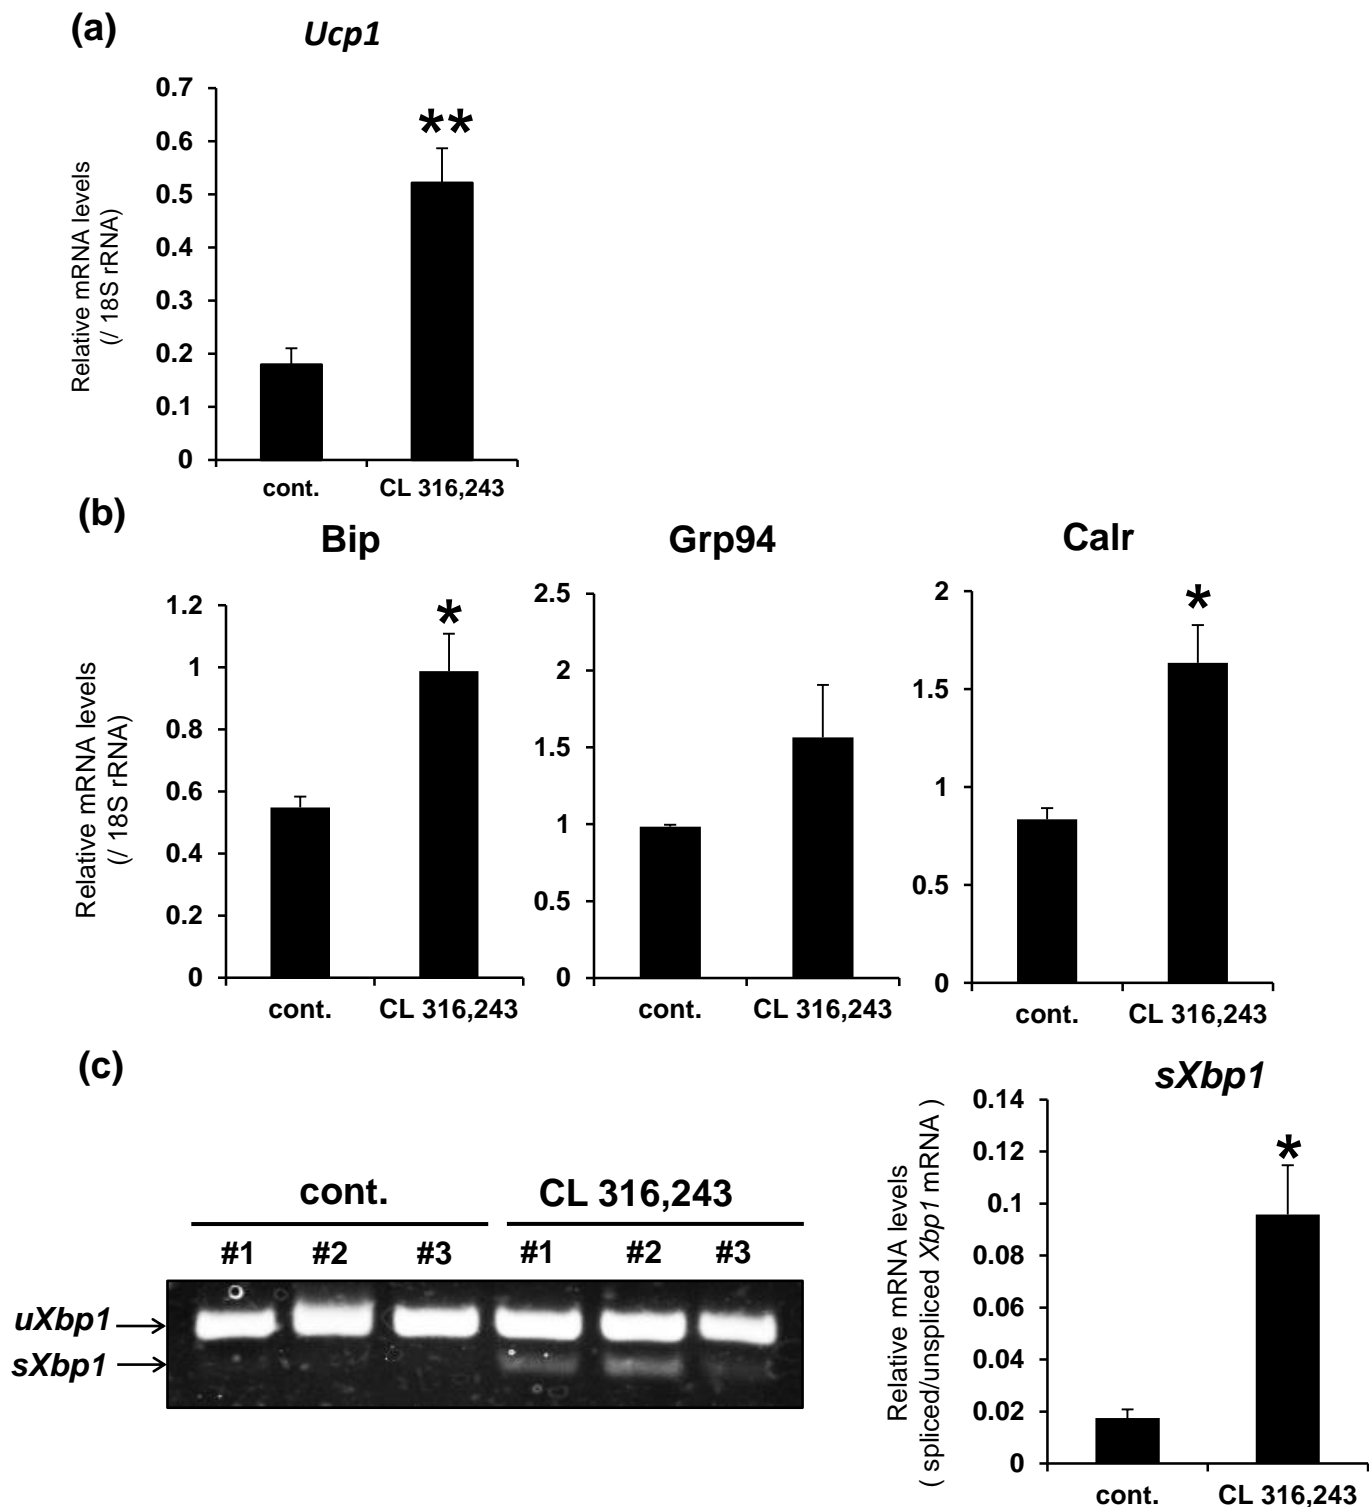

**Supplementary Figure 2.** UPR-related genes were upregulated by subcutaneous injection of CL 316,243 *in vivo*.

(a-b) Real-time PCR analysis of *Ucp1* (a), and UPR-related genes (b) in BAT of mice injected with CL 316,243. (c) RT-PCR analysis of *Xbp1* in BAT injected with CL 316,243 (left panel). *uXbp1* and *sXbp1* indicate unspliced and spliced forms of *Xbp1*, respectively. Graph on right shows the quantification of *Xbp1* splicing levels. Control mice were injected with sterile saline. Differences control and CL 316,243 were analyzed by Student's t-test. Data are mean  $\pm$  S.D. (control: n = 3, CL 316,243: n=3), \*P < 0.05.

## Supplementary Figure 3.

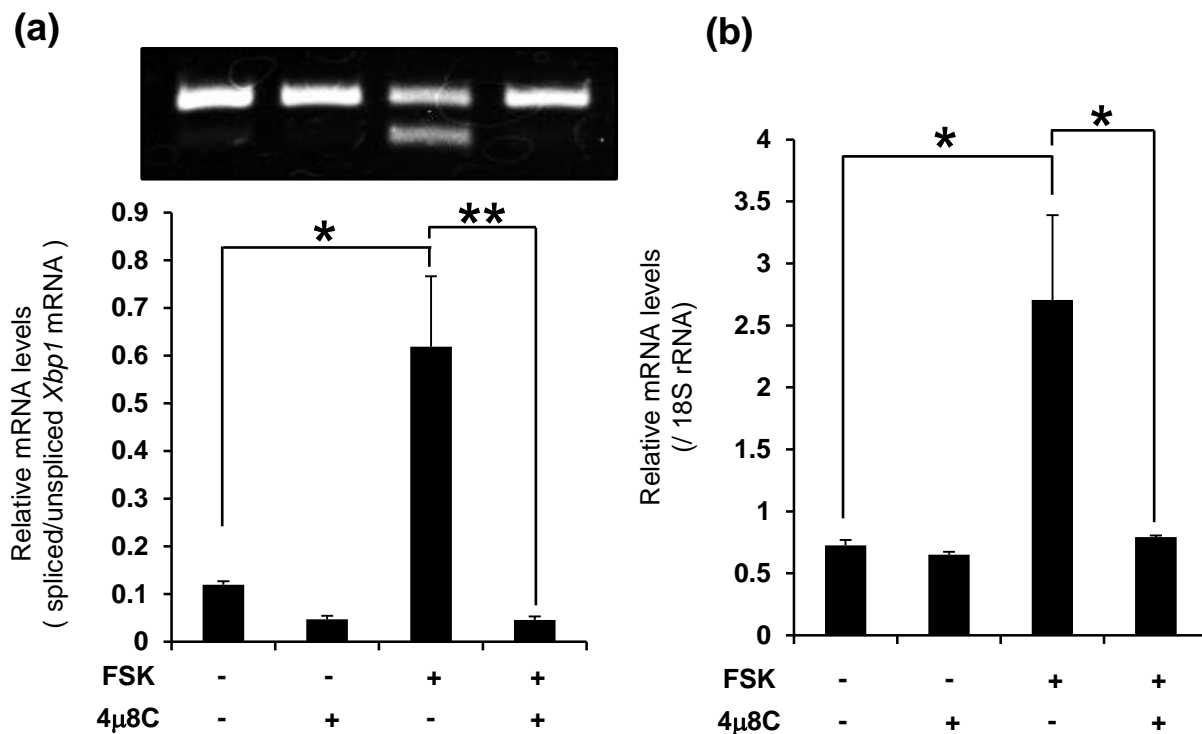

### Supplementary Figure 3. Inhibition of the IRE1 $\alpha$ -XBP1 pathway suppressed the increase in the *Ucp1* expression induced by forskolin.

(a) RT-PCR analysis of *Xbp1* in brown adipocytes that were pre-treated with 30  $\mu$ M 4 $\mu$ 8C for 30 min and then stimulated with 20  $\mu$ M forskolin (FSK) for 3 h (upper panel). Lower graph is the quantification of *Xbp1* splicing levels. (b) Real-time PCR analysis of *Ucp1* in brown adipocytes treated with 4 $\mu$ 8C and FSK described as (a). Note that treatment with 4 $\mu$ 8C significantly decreased *Ucp1* expression induced by FSK. Data are mean  $\pm$  S.D. (n = 4), \*P < 0.05, \*\*P < 0.01.

# Supplementary Figure 4.

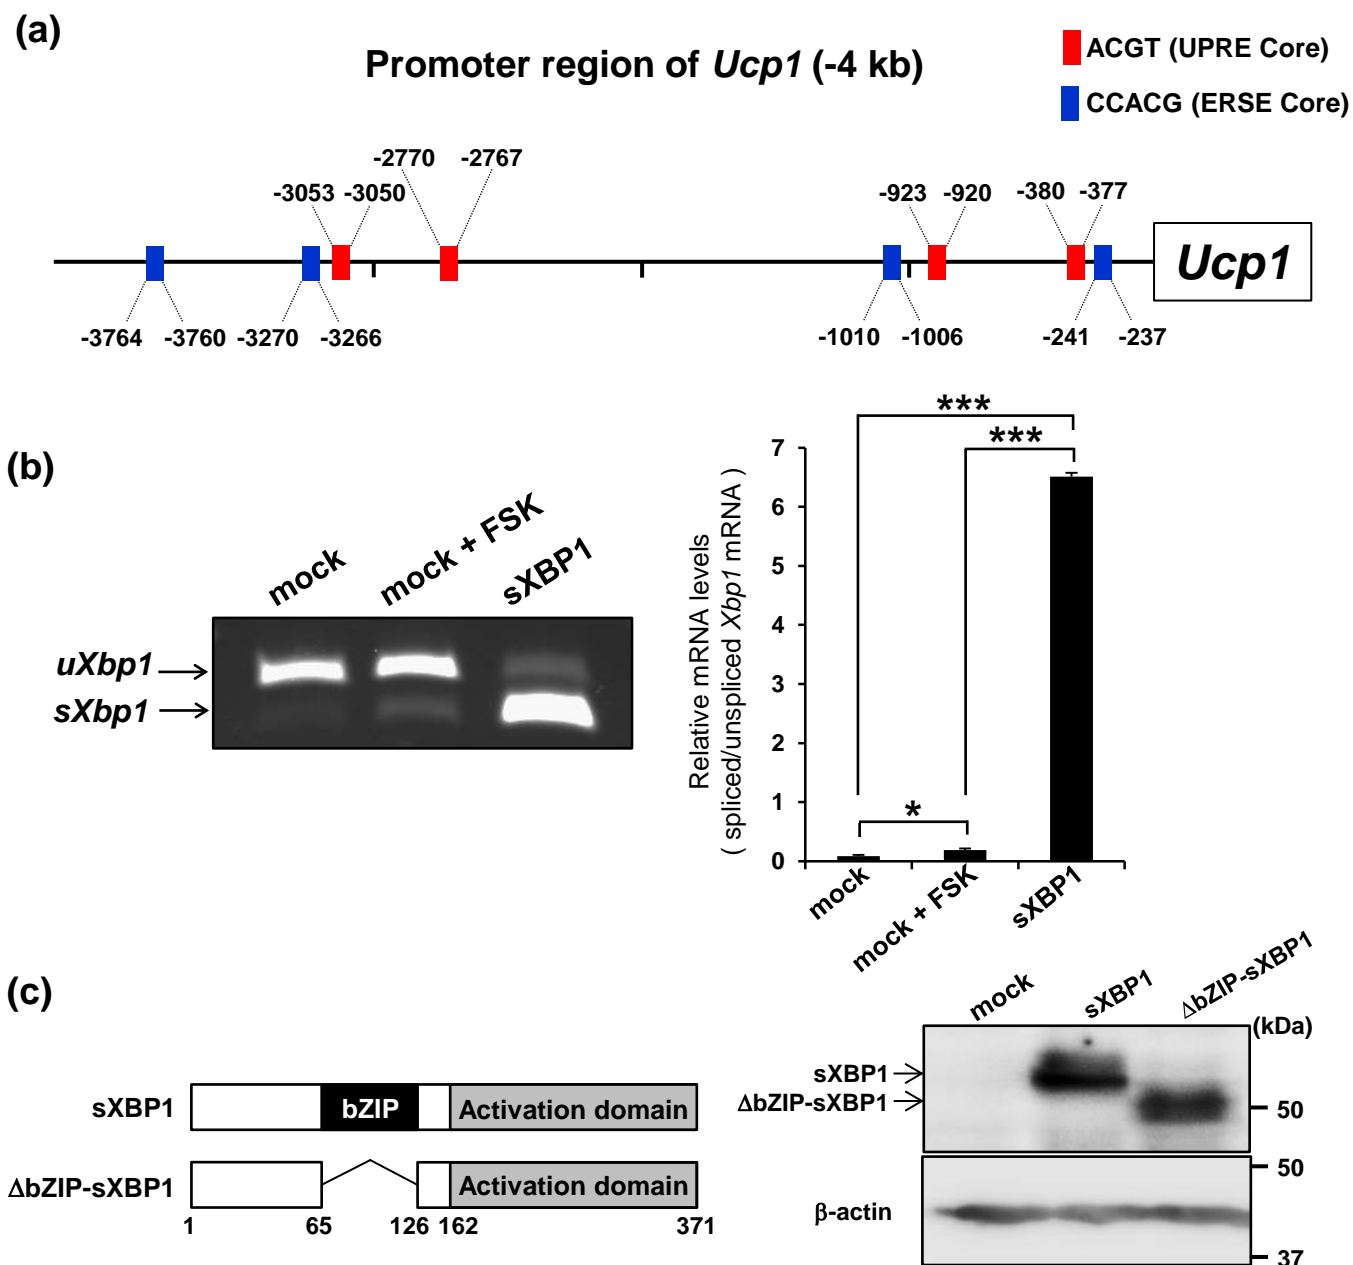

**Supplementary Figure 4. A searching for sXBP1 binding sites, and RT-PCR or WB analysis of *Xbp1* in C3H10T1/2 cells.**

(a) A schematic representation of sXBP1 binding sites in the promoter region of *Ucp1* (-4kb). Red boxes indicate UPRE core sequences and blue boxes indicate ERSE core sequences. Note that there are two UPRE and one ERSE core sequences within -1 kb region. (b) RT-PCR analysis of *Xbp1* in C3H10T1/2 cells transfected with mock or a vector expressing sXBP1 (left panel). *uXbp1* and *sXbp1* indicate unspliced and spliced forms of *Xbp1*, respectively. Graph on right shows the quantification of relative *sXbp1* mRNA levels. forskolin (FSK) treatment time was 4 h. Data are mean  $\pm$  S.D. (n = 3), \*P < 0.05, \*\*\*P < 0.001. (c) A schematic representation of sXBP1 and ΔbZIP-sXBP1 constructs (left panel). The WB analysis of C3H10T1/2 cells transfected with vectors expressing sXBP1 or ΔbZIP-sXBP1 (right panel). The experiment was independently reproduced three times.

# Supplementary Table

| Primer sets used for Real-time PCR or RT-PCR analysis |     |                           |
|-------------------------------------------------------|-----|---------------------------|
| Gene                                                  |     | Sequence                  |
| <i>Ucp1</i>                                           | Fwd | caaatcagctttgcctcactc     |
|                                                       | Rev | acaagctttctgtggtggcta     |
| Bip                                                   | Fwd | gtttgctgaggaagacaaaaagctc |
|                                                       | Rev | cacttccatagagtttgctgataat |
| Grp94                                                 | Fwd | tgtgcagagagaggaagaagc     |
|                                                       | Rev | aactcctcattccagcgagt      |
| Calreticulin                                          | Fwd | tgatgctaagaagcctgagga     |
|                                                       | Rev | ttaggccagctacagcaaaa      |
| <i>Xbp1</i>                                           | Fwd | acacgcttgggaatggacac      |
|                                                       | Rev | ccatgggaagatgttctggg      |
| <i>Erdj4</i>                                          | Fwd | ccatgaagtaccaccctgaca     |
|                                                       | Rev | gaccgagtgtttggttctga      |
| 18S rRNA                                              | Fwd | tgataccgcagctaggaata      |
|                                                       | Rev | tcgttatggtcggaaactacg     |
| Primer set used for construction PCR                  |     |                           |
| Construct                                             |     | Sequence                  |
| sXBP1                                                 | Fwd | caccatggtggtggtggcagcggc  |
|                                                       | Rev | ttagacactaatcagctggg      |
| $\Delta$ bZIP-sXBP1                                   | Fwd | agaacacgcttgggaatggacac   |
|                                                       | Rev | ctcctccgggctcaggtgcgtgagc |
